# Supplementary material
Source: PubMed Central journal article supplement (PMC4922010)
Supplement: Supp_Figure1.pdf [file Supp_Figure1.pdf]

## Supplementary Data

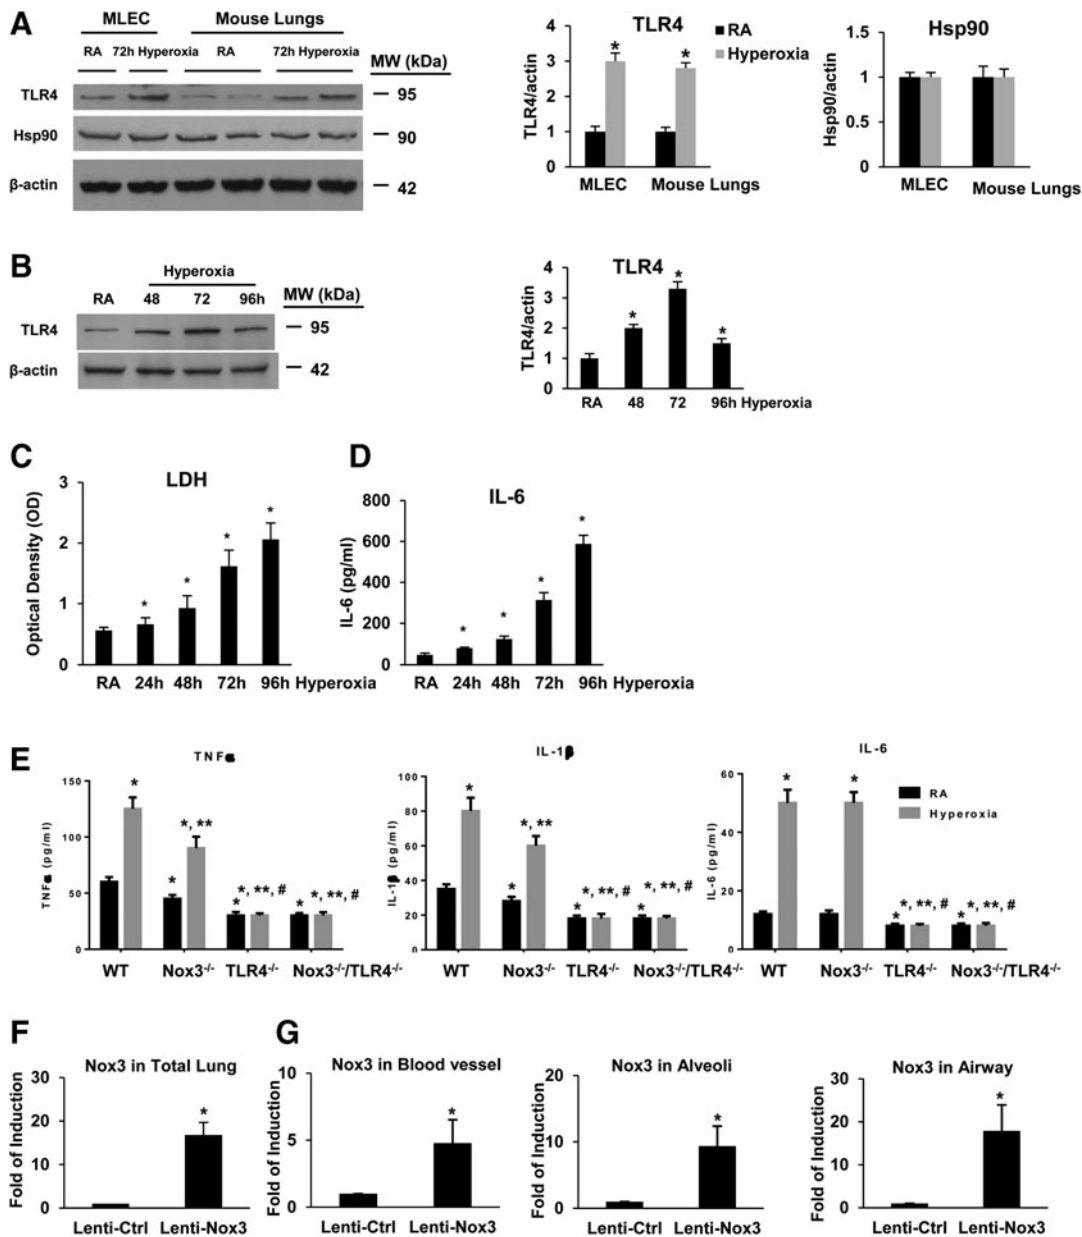

**SUPPLEMENTARY FIG. S1. TLR4-Nox3 mediates hyperoxia-induced inflammation.** (A) Lysates from MLECs or mouse lungs were prepared and immunoblotted against TLR4 or Hsp90 antibody.  $\beta$ -Actin was used as protein loading control. (B) TLR4 level in WT MLECs exposed to a course of hyperoxia. (A, B) Quantification based on densitometry for the listed proteins relative to  $\beta$ -actin is shown on the right panel. Experiments were performed in triplicate. The values are expressed as mean  $\pm$  SD and analyzed by Student's *t* test. \* $p$  < 0.05 versus RA. (C) LDH activity assay from MLEC supernatant exposed to a course of hyperoxia. (D) IL-6 level was detected in supernatants of WT MLECs exposed to a course of hyperoxia. (C, D) The values are expressed as mean  $\pm$  SD and analyzed by Student's *t* test. Experiments were performed in triplicate. \* $p$  < 0.05 versus RA. (E) WT, Nox3<sup>-/-</sup>, TLR4<sup>-/-</sup>, and Nox3<sup>-/-</sup>/TLR4<sup>-/-</sup> mice were exposed to RA or to hyperoxia for 72 h. Secreted TNF $\alpha$ , IL-1 $\beta$ , and IL-6 were detected by enzyme-linked immunosorbent assay in bronchoalveolar lavage fluid obtained from the mice. The values are expressed as mean  $\pm$  SD and analyzed by Mann-Whitney test ( $n$  = 12 in each group). \* $p$  < 0.05 versus WT RA; \*\* $p$  < 0.05 versus WT hyperoxia; # $p$  < 0.05 versus Nox3<sup>-/-</sup> Ad-Ctrl hyperoxia. (F, G) WT mice were administered intranasal lentivirus (lenti-Ctrl or lenti-Nox3); after 2 weeks, whole lung tissues were processed. (F) Nox3 mRNA expression was measured by real-time RT-PCR in lung tissue. (G) Real-time RT-PCR was performed on RNA extracted from laser capture microdissected tissues from blood vessels, alveolar, and large airway tissue (parenchyma) on lung sections. The values are expressed as mean  $\pm$  SD and analyzed by Student's *t* test ( $n$  = 4 for each group). \* $p$  < 0.05 versus lenti-Ctrl. lenti-Ctrl, lentiviral-control; Hsp90, heat shock protein 90; LDH, lactate dehydrogenase; MLECs, mouse lung endothelial cells; mRNA, messenger RNA; Nox, NADPH oxidase; RT-PCR, reverse transcription-polymerase chain reaction; SD, standard deviation; TLR4, Toll-like receptor 4; TNF $\alpha$ , tumor necrosis factor- $\alpha$ ; WT, wild-type.
