# Supplementary material
Source: PubMed Central journal article supplement (PMC4922010)
Supplement: Supp_Figure2.pdf [file Supp_Figure2.pdf]

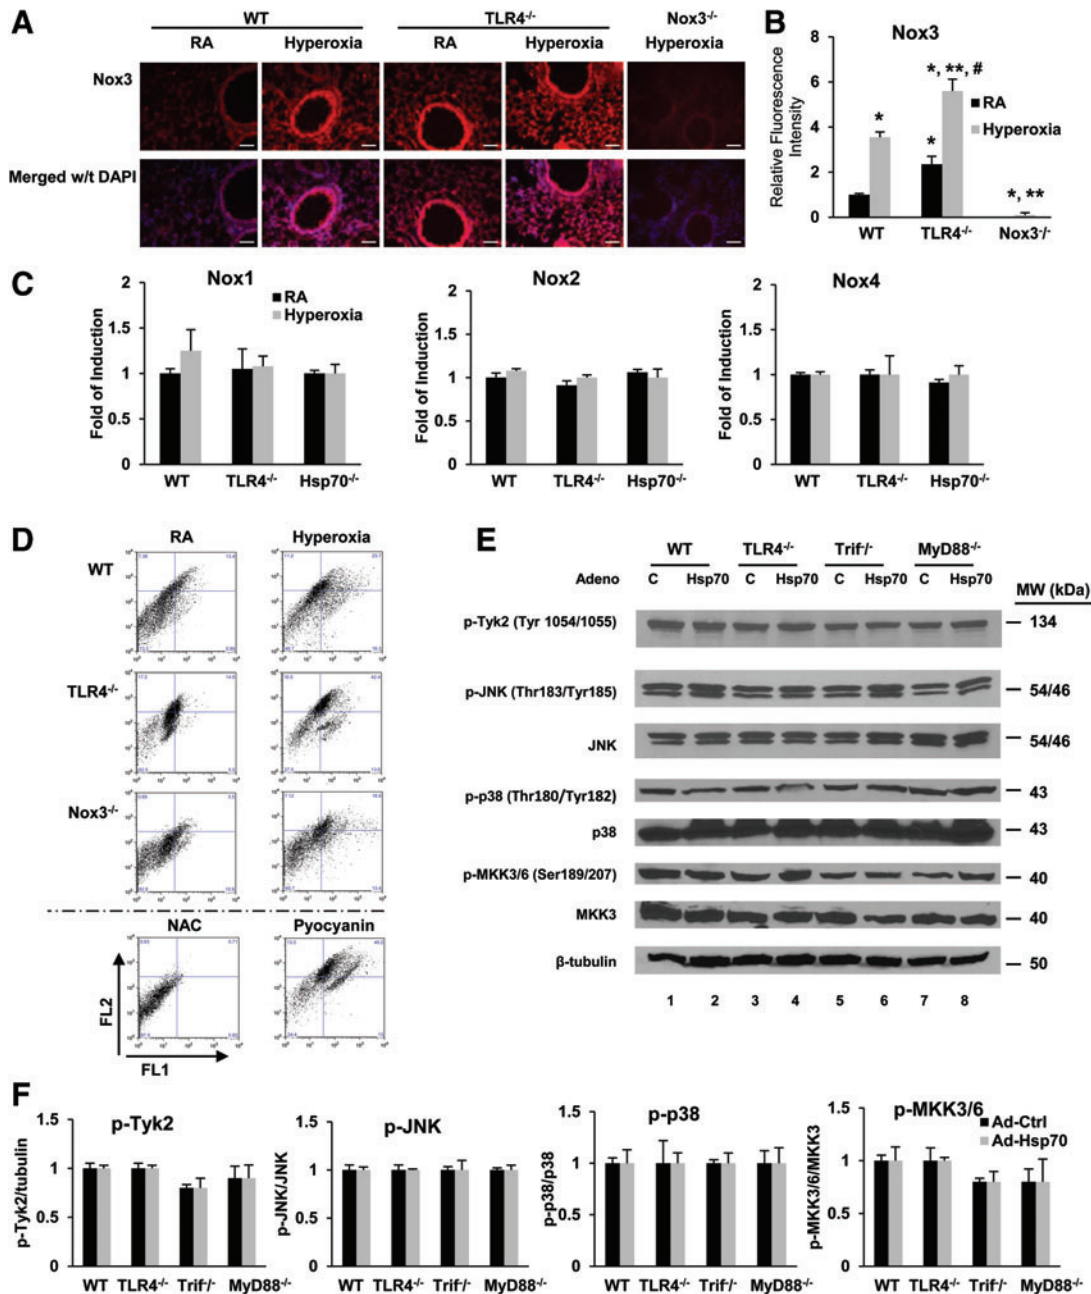

**SUPPLEMENTARY FIG. S2. TLR4 deficiency increases Nox3 protein expression in mouse lungs.** (A) Nox3 expression in mouse lungs with immunofluorescence staining. Nox3 protein is detected as red cytoplasmic fluorescence staining. Images are representative of five mice in each group. Scale bar = 250  $\mu$ m. (B) The relative fluorescence intensity is expressed as mean  $\pm$  SD and analyzed by Mann-Whitney test. Experiments were performed in triplicate. \* $p$  < 0.05 versus WT RA; \*\* $p$  < 0.05 versus WT hyperoxia; # $p$  < 0.05 versus corresponding RA. (C) Nox mRNA levels in WT, TLR4<sup>-/-</sup>, and Hsp70<sup>-/-</sup> MLECs exposed to 72 h of hyperoxia. The values are expressed as mean  $\pm$  SD and analyzed by Mann-Whitney test. Experiments were performed in triplicate. There is no significant difference between each group. (D) WT, TLR4<sup>-/-</sup>, and Nox3<sup>-/-</sup> MLECs were exposed to 72 h of hyperoxia. ROS-positive cells and superoxide-positive cells were measured by flow cytometry. The ROS inhibitor, N-acetyl-L-cysteine (NAC, 5 mM), or the ROS inducer, pyocyanin (Pyo, 200  $\mu$ M), was incubated with WT MLECs as the negative or positive control. Graphical quantitation of flow cytometry analysis based on log FL1 (x-axis) versus log FL2 (y-axis) dot plots. The representative dot plots of three experiments are shown. Cells with increased levels of oxidative stress demonstrate a *bright green* staining in the presence of the oxidative stress detection reagent and can be registered in the FL1 channel. Such cells will appear in the *upper* and *lower right* quadrants of a log FL1 (x-axis) versus a log FL2 (y-axis) dot plot. Cells with increased production of superoxide demonstrate *bright orange fluorescence* and will be detected using the FL2 channel. Such cells will appear in the two upper quadrants of a log FL1 (x-axis) versus a log FL2 (y-axis) dot plot. Graphical quantitation of flow cytometry analysis is shown in Figure 6C. (E) WT, TLR4<sup>-/-</sup>, Trif<sup>-/-</sup>, and MyD88<sup>-/-</sup> MLECs were treated with Ad-Ctrl or Ad-Hsp70. Cell lysates were immunoblotted against antibodies shown on the left.  $\beta$ -Tubulin was used as protein loading control. One representative Western blot of three independent experiments is shown. (F) Quantification based on densitometry for the listed proteins relative to  $\beta$ -tubulin. The values are expressed as mean  $\pm$  SD and analyzed by Mann-Whitney test. Experiments were performed in triplicate. There is no significant difference between each group. Ad-Hsp70, adenoviral-Hsp70; ROS, reactive oxygen species.
