# Supplementary material
Source: PubMed Central journal article supplement (PMC4922010)
Supplement: Supp_Figure3.pdf [file Supp_Figure3.pdf]

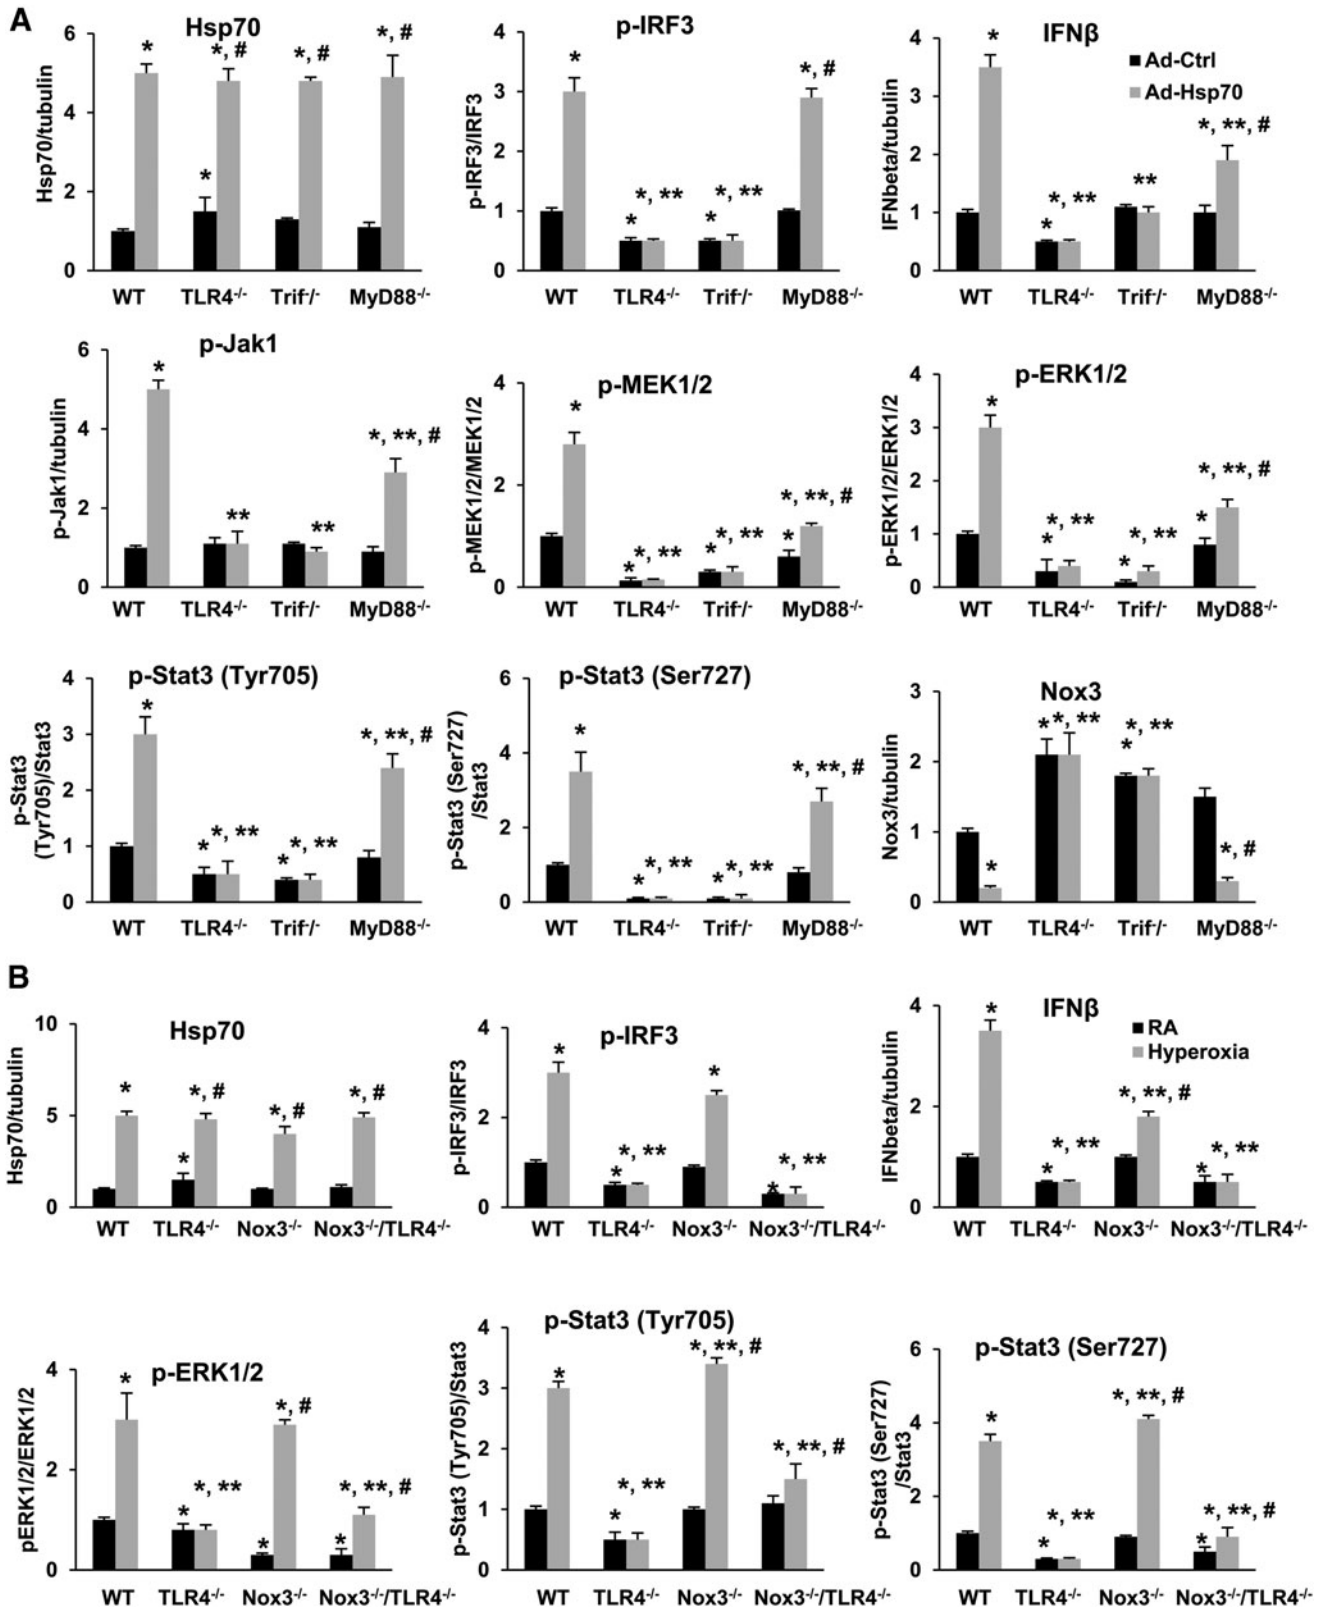

**SUPPLEMENTARY FIG. S3. Western blot quantifications.** (A) Quantification based on densitometry for the listed proteins relative to loading control (Fig. 8B). The values are expressed as mean ± SD and analyzed by Mann–Whitney test. Experiments were performed in triplicate. \**p* < 0.05 versus WT Ad-Ctrl; \*\**p* < 0.05 versus WT Ad-Hsp70, #*p* < 0.05 versus corresponding Ad-Ctrl. (B) Quantification based on densitometry for the listed proteins relative to loading control (Fig. 8C). The values are expressed as mean ± SD and analyzed by Mann–Whitney test. Experiments were performed in triplicate. \**p* < 0.05 versus WT RA; \*\**p* < 0.05 versus WT hyperoxia, #*p* < 0.05 versus corresponding RA.
