# Supplementary material
Source: PubMed Central journal article supplement (PMC4922010)
Supplement: Supp_Figure4.pdf [file Supp_Figure4.pdf]

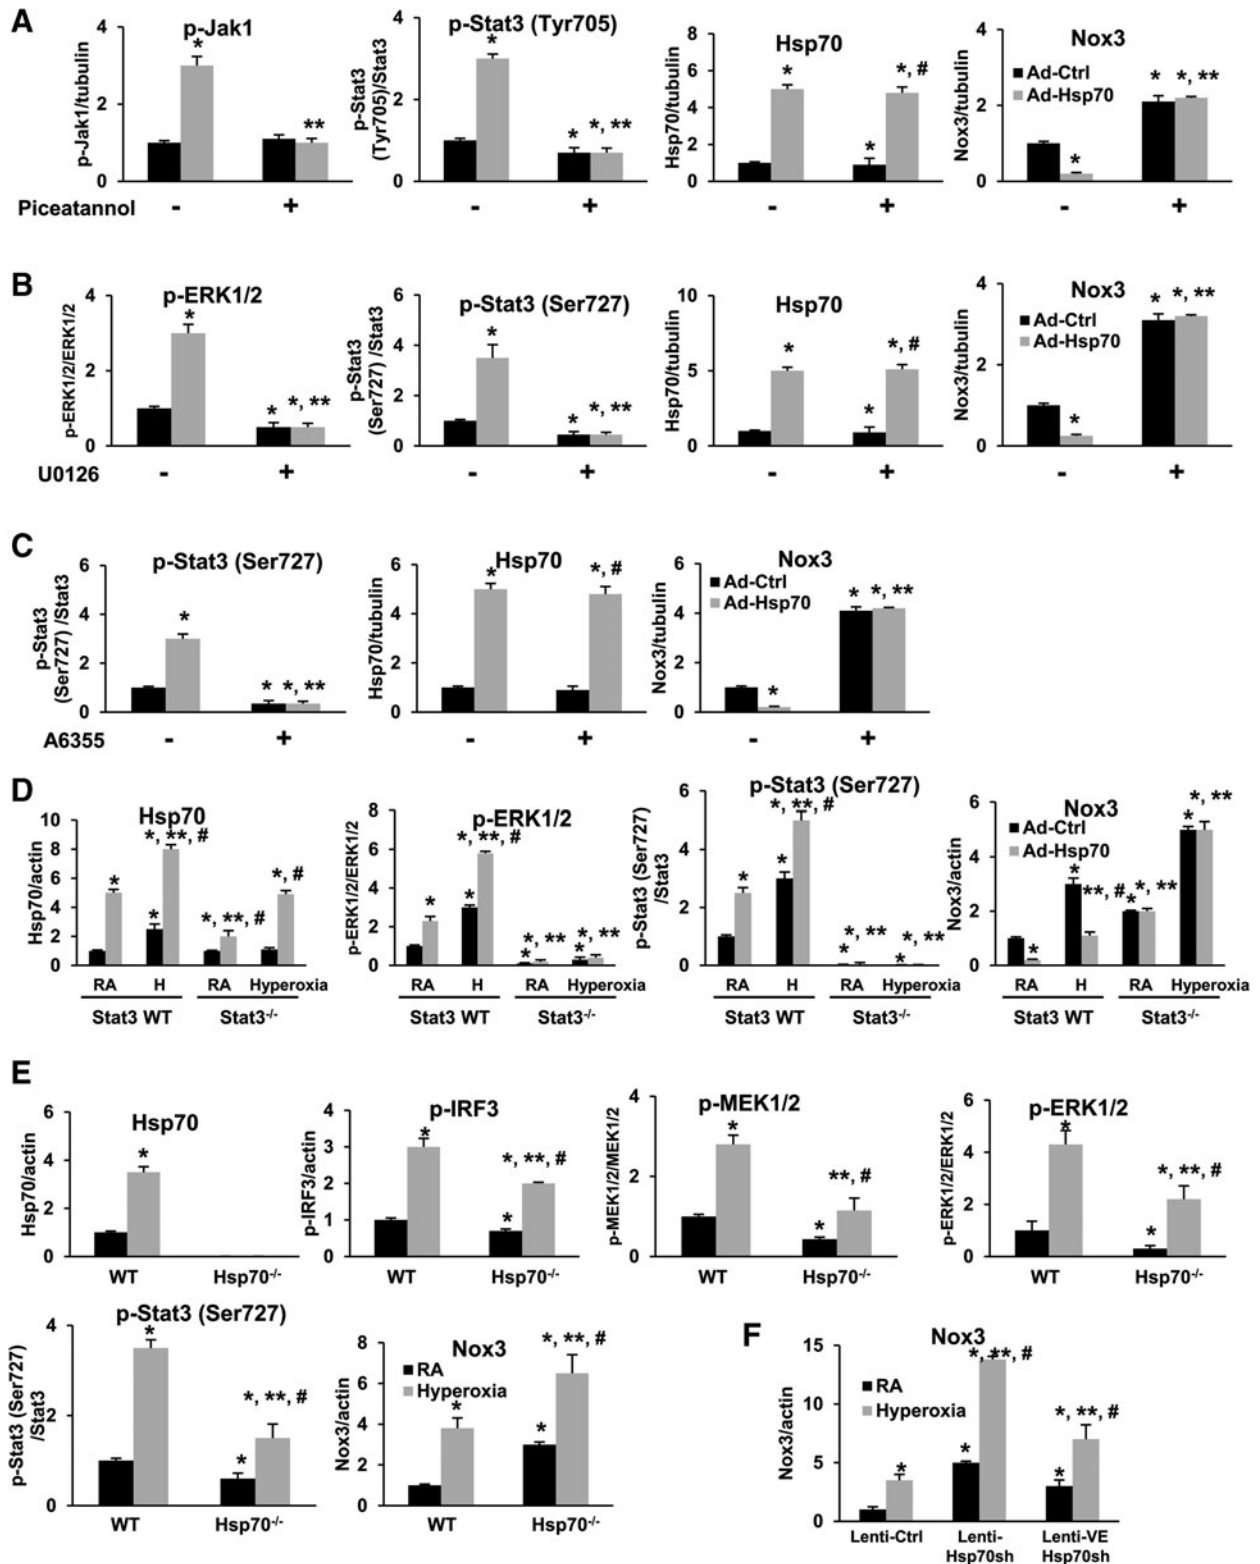

**SUPPLEMENTARY FIG. S4. Western blot quantifications.** (A–D) Quantifications for Figure 9E–H. (E) Quantifications for Figure 10A. (F) Quantifications for Figure 10C. Quantification based on densitometry for the listed proteins relative to loading control. The values are expressed as mean  $\pm$  SD and analyzed by Mann–Whitney test. Experiments were performed in triplicate. (A) \* $p < 0.05$  versus Ad-Ctrl without piceatannol; \*\* $p < 0.05$  versus Ad-Hsp70 without piceatannol. (B) \* $p < 0.05$  versus Ad-Ctrl without U0126; \*\* $p < 0.05$  versus Ad-Hsp70 without U0126. (C) \* $p < 0.05$  versus Ad-Ctrl without A6355; \*\* $p < 0.05$  versus Ad-Hsp70 without A6355. (D) \* $p < 0.05$  versus Stat3 WT Ad-Ctrl RA; \*\* $p < 0.05$  versus Stat3 WT Ad-Hsp70 RA; # $p < 0.05$  versus corresponding Ad-Ctrl. (E) \* $p < 0.05$  versus WT RA; \*\* $p < 0.05$  versus WT hyperoxia; # $p < 0.05$  versus corresponding RA. (F) \* $p < 0.05$  versus lenti-Ctrl RA; \*\* $p < 0.05$  versus lenti-Ctrl hyperoxia; # $p < 0.05$  versus corresponding RA. Stat3, signal transducer and activator of transcription.
